# Supplementary material
Source: HighWire-hosted journal article supplement (https://web.archive.org/content/suppl/2010/03/09/303.6.576)

# Cirugía bariátrica

Millones de personas en los Estados Unidos y en todo el mundo tienen sobrepeso o son **obesas** (sobrepeso grave). Cuando el peso aumenta a un nivel extremo, se denomina **obesidad mórbida**. La obesidad se asocia con la diabetes, la enfermedad cardíaca, la presión arterial alta, algunos tipos de cáncer y otros problemas médicos. La **bariátrica** es el campo de la medicina que se especializa en el tratamiento de la obesidad. **Cirugía bariátrica** es el término que se refiere a las operaciones que ayudan a promover la pérdida de peso. Los procedimientos de cirugía bariátrica solo se consideran para personas con obesidad grave (aproximadamente 100 libras de sobrepeso o un índice de masa corporal mayor de 40) y no para personas con un problema de peso leve. La edición del 10 de febrero de 2010 de *JAMA* incluye un artículo acerca del procedimiento **laparoscópico** (cirugía realizada a través de tubos) de banda gástrica ajustable para adolescentes gravemente obesos. Esta Hoja para el Paciente está basada en otra publicada anteriormente en la edición de *JAMA* del 19 de octubre de 2005.

## OBESIDAD

El **índice de masa corporal (IMC)** es una forma estándar de definir el sobrepeso, la obesidad y la obesidad mórbida. El IMC se calcula sobre la base de la estatura y el peso de una persona: peso en kilogramos (2.2 libras por kilogramo) dividido por el cuadrado de la estatura en metros (39.37 pulgadas por metro). Un IMC de 25 o más se considera sobrepeso; 30 o más, obesidad; y 40 o más, obesidad mórbida. La cirugía bariátrica puede ofrecerse a los pacientes con obesidad grave cuando los tratamientos médicos, incluidos los cambios en el estilo de vida, como alimentación sana y ejercicio regular, no han sido efectivos.

## CONSIDERACIONES PARA LA CIRUGÍA BARIÁTRICA

Las personas que estén considerando la cirugía bariátrica deben analizar los riesgos y posibles beneficios con su médico. La cirugía bariátrica tiene riesgos asociados y consecuencias a largo plazo, y debe considerarse únicamente como una parte de un abordaje para tratar la obesidad. La mayoría de los cirujanos bariátricos opina que las operaciones tienen mejores resultados cuando ayudan a promover cambios de por vida en la conducta y en la alimentación. Para evitar complicaciones que pueden representar un riesgo para la vida, es esencial realizar un seguimiento a largo plazo con médicos experimentados en la atención de pacientes sometidos a estos procedimientos, así como también administrar suplementos vitamínicos de por vida.

## PARA OBTENER MÁS INFORMACIÓN

- American Society for Metabolic & Bariatric Surgery (Sociedad Estadounidense para Cirugía Metabólica y Bariátrica) [www.asmb.org](http://www.asmb.org)
- Centers for Disease Control and Prevention (Centros para el Control y la Prevención de Enfermedades), BMI Calculator (Calculadora del IMC) [www.cdc.gov/nccdphp/dnpa/bmi/calc-bmi.htm](http://www.cdc.gov/nccdphp/dnpa/bmi/calc-bmi.htm)

## INFÓRMESE

Para encontrar esta y otras Hojas para el Paciente de *JAMA* anteriores, vaya al enlace Patient Page (Hoja para el Paciente) del sitio web de *JAMA* en [www.jama.com](http://www.jama.com). Muchas están disponibles en inglés y español.

Fuentes: American Society of Bariatric Physicians, American Society for Metabolic & Bariatric Surgery, National Institute of Diabetes and Digestive and Kidney Diseases, American Obesity Organization, Centers for Disease Control and Prevention

Janet M. Torpy, MD, Writer

Cassio Lynn, MA, Illustrator

Richard M. Glass, MD, Editor

La Hoja para el Paciente de *JAMA* es un servicio al público de *JAMA*. La información y las recomendaciones que aparecen en esta hoja son adecuadas en la mayoría de los casos, pero no reemplazan el diagnóstico médico. Para obtener información específica relacionada con su afección médica personal, *JAMA* le sugiere que consulte a su médico. Los médicos y otros profesionales de atención médica pueden fotocopiar esta hoja con fines no comerciales, para compartirla con pacientes. Para comprar reimpresiones en grandes cantidades, llame al 312/464-0776.

### Tipos de operaciones bariátricas

La cirugía bariátrica puede realizarse mediante un abordaje abierto (una incisión de 8 a 10 pulgadas en el medio del abdomen) o mediante un abordaje laparoscópico (varias incisiones de 1/2 a 2 pulgadas que permiten a las cámaras y los instrumentos ingresar en el abdomen).

#### Bypass gástrico (derivación gástrica en Y de Roux)

Bolsa, Grapas, Estómago, Trayectoria de los alimentos, Intestino

El tamaño del estómago se reduce de forma permanente a una bolsa del tamaño de un huevo. La bolsa vuelve a unirse a un conducto de intestino de 2 pies de longitud que elude el estómago. La cantidad de alimento ingerido está limitada por el tamaño de la bolsa y el tamaño de la conexión de la bolsa al intestino.

#### Banda gástrica ajustable

Puerto de ajuste, Esófago, Banda ajustable, Trayectoria de los alimentos, Estómago, Intestino

El tamaño de la apertura desde el esófago al estómago se reduce mediante la banda gástrica; esto disminuye la cantidad de alimento que es posible comer con comodidad.

El cirujano puede ajustar el tamaño de la apertura inflando o desinflando la banda mediante un puerto de ajuste ubicado en la pared del abdomen, justo debajo de la piel. La banda puede retirarse cuando se desea.

#### Gastrectomía en manga

Esófago, Grapas, Estómago restante, Trayectoria de los alimentos, Parte de estómago extirpado, Intestino

Extirpación de la mayor parte del estómago; esto lo convierte en un tubo delgado. Los resultados del procedimiento no se han estudiado bien.

C. Lynn  
Furke  
A. CAMPBELL

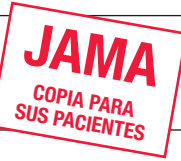

Supplement: pdfpat021010.pdf [file pdfpat021010.pdf]
